# Supplementary material for: Deciphering the drivers of direct and indirect damages to companies from an unprecedented flood event: A data-driven, multivariate probabilistic approach
Source: Copernicus journal article supplement (doi:10.5194/egusphere-2025-1715), 2025-04-25
Supplement: Supplementary file [file egusphere-2025-1715-AC1-supplement.pdf]

# **Egusphere-2025-1715: Deciphering the drivers of direct and indirect damages to companies from an unprecedented flood event: A data-driven, multivariate probabilistic approach**

## **Reviewer #1:**

This is an interesting and highly relevant topic that can significantly contribute to a deeper understanding of the various factors influencing both direct and indirect damages to businesses caused by flooding events. The research methods employed are notably technical and innovative, offering fresh perspectives and valuable insights into the complexity of flood-related impacts on commercial sectors. However, despite the strengths of the approach, there are certain points that require further attention and refinement. These include the justification of chosen methodologies, the interpretation of the survey results, a more clear interpretation of the results, and the need for a more comprehensive discussion of the limitations and potential implications of the findings. Addressing these aspects would enhance the overall robustness and applicability of the study.

We would like to express our sincere gratitude to the Editor for keeping the discussion open upon request and would like to thank the reviewer for acknowledging the significance of our study and for providing valuable feedback. The comments were extremely helpful in improving the quality of the manuscript and will be acknowledged. We provide detailed responses to each comment below, with reviewer comments shown in blue and our responses in black. All references cited in our responses are listed at the end of this letter.

Abstract, 'to date no study has examined the factors influencing company damages during such an extreme event'; is this a correct statement? In the introduction you mention multiple papers that investigated the factors that influenced company damages such as Endendijk et al. (2024), Kreibich et al. (2010). Please clarify or revise this statement.

We thank the reviewer for this important observation. We will revise the original statement in abstract as follows:

*"While the drivers of company damages from riverine flooding are well documented, the drivers of both direct and indirect damages during an extreme flash flood event have not yet been examined."*

## **We will also revise the abstract as follows:**

*Floods are among the most destructive natural hazards, causing extensive damage to companies through direct impacts on assets and prolonged business interruptions. The extraordinary July 2021 fast-onset flood in Germany caused unprecedented damage, particularly in North Rhine-Westphalia and Rhineland-Palatinate, affecting companies of all sizes. While the drivers of company damages from riverine flooding are well documented, the drivers of both direct and indirect damages during an extreme flash flood event have not yet been examined. This study addresses this gap using survey data from 431 companies affected by the July 2021 flood. Results show that 62% of companies incurred direct damages exceeding €100,000. Machine learning models and Bayesian network analyses identify water depth and flow velocity as the primary drivers of both direct damage and business interruption. However, company characteristics (e.g., premises size, number of employees) and preparedness also play critical roles. Companies that implemented precautionary measures experienced significantly shorter business interruption durations—up to 58% for water depths below 1 m and 44% for depths above 2 m. These findings offer important insights for policy development and risk-informed decision-making. Incorporation of behavioural indicators into flood risk management strategies and improving early warning systems could significantly enhance business preparedness.*

## **Method**

Survey data, it would be good to better define the variables in an appendix for example. It is not clear how business interruption is defined. Does business interruption mean that the business is not operational at all or that there is a reduction in business activity, if so how much is this reduction. This should be better defined.

In the revised manuscript, we will add an overview of all variables in the appendix (Table A1). Business interruption and restriction are defined as follows:

*Business interruption duration (bid):* The number of days during which business operations were completely suspended as a direct consequence of the flooding event. A value of 0 indicates no interruption, while values up to 540 represent the reported duration of full shutdown. A value of 540 days reflects the survey limit, meaning the business had not yet resumed operations when the survey ended.

*Business restriction duration (brd):* The number of days it took after the flooding event until the business resumed operations without any restrictions. Restrictions refer to any form of reduced capacity compared to pre-flood conditions. The maximum value is 540 days, meaning the business still had restrictions when the survey ended.

**Table A1:** Overview of company variables, associated survey questions, response types (continuous, ordinal, nominal), and, for selected variables, the steps applied to develop the index.

| Variable   |                     | Survey question                                                                                          | Response Type (and Index development)                                                                                                                                                                                                                                                                                                                                                                                     |
|------------|---------------------|----------------------------------------------------------------------------------------------------------|---------------------------------------------------------------------------------------------------------------------------------------------------------------------------------------------------------------------------------------------------------------------------------------------------------------------------------------------------------------------------------------------------------------------------|
| <i>wd</i>  | Water depth         | At maximum water level, how high was the water above the Earth's surface on your company premises in cm? | Continuous variable                                                                                                                                                                                                                                                                                                                                                                                                       |
| <i>d</i>   | Inundation duration | For how many hours did water remain on the company premises?                                             | Continuous variable                                                                                                                                                                                                                                                                                                                                                                                                       |
| <i>v</i>   | Velocity indicator  | How strong was the water current in the immediate vicinity of your company?                              | <ul style="list-style-type: none"> <li>• 1 – Calm/slowly flowing</li> <li>• 2</li> <li>• 3</li> <li>• 4</li> <li>• 5</li> <li>• 6 – Wild/turbulent current</li> </ul> <p>Recoded categories (used in the analysis):</p> <ol style="list-style-type: none"> <li>1. Low flow (original categories 1–2)</li> <li>2. Moderate flow (original categories 3–4)</li> <li>3. Torrential flow (original categories 5–6)</li> </ol> |
| <i>con</i> | Contamination       | Did contamination from the following substances entered your company during the flood event?             | <p><i>Categorical response (with multiple options possible):</i></p> <ul style="list-style-type: none"> <li>• Oil/Gasoline</li> <li>• Chemicals</li> </ul>                                                                                                                                                                                                                                                                |

|           |                        |                                                               |                                                                                                                                                                                                                                                                                                                                                                                                                                                                                                                                                                                                                                                                                                                                                                                               |
|-----------|------------------------|---------------------------------------------------------------|-----------------------------------------------------------------------------------------------------------------------------------------------------------------------------------------------------------------------------------------------------------------------------------------------------------------------------------------------------------------------------------------------------------------------------------------------------------------------------------------------------------------------------------------------------------------------------------------------------------------------------------------------------------------------------------------------------------------------------------------------------------------------------------------------|
|           |                        |                                                               | <ul style="list-style-type: none"> <li>• Sewage</li> <li>• No contamination</li> </ul> <p>Recoded categories (used in the analysis):</p> <ol style="list-style-type: none"> <li>0. No contamination</li> <li>1. Sewage or Chemicals only</li> <li>2. Oil/Gasoline only</li> <li>3. Oil/Gasoline + Sewage, or Oil/Gasoline + Chemicals</li> <li>4. Oil/Gasoline + Chemicals + Sewage</li> </ol>                                                                                                                                                                                                                                                                                                                                                                                                |
| <i>ew</i> | Early warning received | Did your company receive an early warning of the flood event? | <ol style="list-style-type: none"> <li>0. No</li> </ol> <p>Yes</p>                                                                                                                                                                                                                                                                                                                                                                                                                                                                                                                                                                                                                                                                                                                            |
| <i>ws</i> | Early warning source   | From which source did your company receive the flood warning? | <p><i>Response (with multiple options possible):</i></p> <ul style="list-style-type: none"> <li>• Loudspeaker announcements</li> <li>• App or SMS</li> <li>• Telephone call</li> <li>• Radio report</li> <li>• TV report</li> <li>• Newspaper report</li> <li>• Social media</li> <li>• Own research</li> <li>• Own observation</li> <li>• No warning</li> </ul> <p>Recoded categories (used in the analysis):</p> <ol style="list-style-type: none"> <li>0. No warning</li> <li>1. Own research</li> <li>2. Contacts (employees, acquaintances, other companies, phone calls)</li> <li>3. Media (radio, TV, newspaper, online, social media)</li> <li>1. Official authorities (direct official warning, apps/SMS, civil protection, loudspeaker announcements, regional services)</li> </ol> |
| <i>wt</i> | Warning lead time      | How many hours before the arrival of the flash flood or heavy | Number of hours before the arrival of the flash flood or heavy rainfall that the warning reached the company. Companies that reported                                                                                                                                                                                                                                                                                                                                                                                                                                                                                                                                                                                                                                                         |

|           |                               |                                                                                                                             |                                                                                                                                                                                                                                                                                                                                                                                                                                                                                                                                                                                                                                                                                                                                                                                               |
|-----------|-------------------------------|-----------------------------------------------------------------------------------------------------------------------------|-----------------------------------------------------------------------------------------------------------------------------------------------------------------------------------------------------------------------------------------------------------------------------------------------------------------------------------------------------------------------------------------------------------------------------------------------------------------------------------------------------------------------------------------------------------------------------------------------------------------------------------------------------------------------------------------------------------------------------------------------------------------------------------------------|
|           |                               | rainfall did the warning reach your company?                                                                                | “no warning received” were coded as 0 hours, as they were not asked the follow-up question on warning lead time. This approach reduced the proportion of missing values.                                                                                                                                                                                                                                                                                                                                                                                                                                                                                                                                                                                                                      |
| <i>ws</i> | Early warning source          | From which source did your company receive the flood warning?                                                               | <p><i>Response (with multiple options possible):</i></p> <ul style="list-style-type: none"> <li>• Loudspeaker announcements</li> <li>• App or SMS</li> <li>• Telephone call</li> <li>• Radio report</li> <li>• TV report</li> <li>• Newspaper report</li> <li>• Social media</li> <li>• Own research</li> <li>• Own observation</li> <li>• No warning</li> </ul> <p>Recoded categories (used in the analysis):</p> <ol style="list-style-type: none"> <li>4. No warning</li> <li>5. Own research</li> <li>6. Contacts (employees, acquaintances, other companies, phone calls)</li> <li>7. Media (radio, TV, newspaper, online, social media)</li> <li>8. Official authorities (direct official warning, apps/SMS, civil protection, loudspeaker announcements, regional services)</li> </ol> |
| <i>me</i> | Emergency measures undertaken | Were measures to reduce damage undertaken in your company before or during the flood event?                                 | <ol style="list-style-type: none"> <li>0. No</li> <li>1. Yes</li> </ol>                                                                                                                                                                                                                                                                                                                                                                                                                                                                                                                                                                                                                                                                                                                       |
| <i>ep</i> | Emergency plan                | At the time of the flood event, did your company have an emergency or flood protection plan?                                | <ol style="list-style-type: none"> <li>0. No</li> <li>1. Yes</li> </ol>                                                                                                                                                                                                                                                                                                                                                                                                                                                                                                                                                                                                                                                                                                                       |
| <i>kh</i> | Knowledge about hazard        | <p>Had this site already been flooded before?</p> <p>Were you aware that your company is located in a flood-prone area?</p> | This variable was derived from two survey questions. If a site had been flooded before, we coded the company as having knowledge (Yes). If the site had not been flooded before, we then used the follow-up question on awareness of being located in a flood-prone area. Companies that reported awareness were                                                                                                                                                                                                                                                                                                                                                                                                                                                                              |

|           |                            |                                                                                                                                                                                          |                                                                                                                                                                                                                                                                                                                                                                                                                                                                                                                                                                                                                                                                                                                          |
|-----------|----------------------------|------------------------------------------------------------------------------------------------------------------------------------------------------------------------------------------|--------------------------------------------------------------------------------------------------------------------------------------------------------------------------------------------------------------------------------------------------------------------------------------------------------------------------------------------------------------------------------------------------------------------------------------------------------------------------------------------------------------------------------------------------------------------------------------------------------------------------------------------------------------------------------------------------------------------------|
|           |                            |                                                                                                                                                                                          | coded as Yes, while those that were not aware were coded as No.                                                                                                                                                                                                                                                                                                                                                                                                                                                                                                                                                                                                                                                          |
| <i>ms</i> | Emergency measures success | <p>Were measures to reduce damage undertaken in your company before or during the flood event?</p> <p>How effective were these mitigation measures?</p>                                  | <p>This variable was based on two survey questions. First, respondents were asked whether any measures to reduce damage were undertaken before or during the flood event. If no measures were undertaken, the company was coded as “No measure undertaken.” If measures were reported, respondents were then asked to rate their effectiveness. Responses were coded into four categories: Completely ineffective, Partly effective, Mostly effective, Completely effective.</p> <p>Recoded categories (used in the analysis):</p> <ol style="list-style-type: none"> <li>0. No measure undertaken</li> <li>1. Completely ineffective,</li> <li>2. Partly effective,</li> <li>3. Mostly/ completely effective</li> </ol> |
| <i>fe</i> | Flood experience           | Q1: Had this company site already been flooded before the event? If yes, how many times?                                                                                                 | <p>Number of previous floods:</p> <ol style="list-style-type: none"> <li>0. Never</li> <li>1. Once</li> <li>2. Twice</li> <li>3. <math>\geq</math> Three times</li> </ol>                                                                                                                                                                                                                                                                                                                                                                                                                                                                                                                                                |
|           |                            | Q2: When was the company site last affected by a flood prior to the event? (Year)                                                                                                        | <p>Time elapsed since the last flood:</p> <ol style="list-style-type: none"> <li>1. &gt; 25 years ago</li> <li>2. 11–25 years ago</li> <li>3. 2–10 years ago</li> </ol>                                                                                                                                                                                                                                                                                                                                                                                                                                                                                                                                                  |
|           |                            | Flood experience was calculated from the number of previous floods (Q1) and the time elapsed since the last flood (Q2).                                                                  | <ul style="list-style-type: none"> <li>• If only one value (Q1 or Q2) was available, that value was used.</li> <li>• If both values were available, the flood experience score was calculated as the mean of the two.</li> </ul>                                                                                                                                                                                                                                                                                                                                                                                                                                                                                         |
| <i>pr</i> | Precaution indicator       | <p><i>Measures included</i></p> <p>V1. Company insured against flood damages.</p> <p>V2. Heating system adjusted (converted or flood-protected).</p> <p>V3. Emergency plan in place.</p> | <p>Conversion:</p> <ul style="list-style-type: none"> <li>• Each measure was coded as 1 if implemented prior to the flood, 0 otherwise.</li> </ul>                                                                                                                                                                                                                                                                                                                                                                                                                                                                                                                                                                       |

|            |                   |                                                                                                                                                                                                                                                                                                                                                                                                                                                                                                                                                  |                                                                                                                                                                                                                                                                                                                                                                                                                                                                                                                                                                                                                                                                                                                                                                                                                              |
|------------|-------------------|--------------------------------------------------------------------------------------------------------------------------------------------------------------------------------------------------------------------------------------------------------------------------------------------------------------------------------------------------------------------------------------------------------------------------------------------------------------------------------------------------------------------------------------------------|------------------------------------------------------------------------------------------------------------------------------------------------------------------------------------------------------------------------------------------------------------------------------------------------------------------------------------------------------------------------------------------------------------------------------------------------------------------------------------------------------------------------------------------------------------------------------------------------------------------------------------------------------------------------------------------------------------------------------------------------------------------------------------------------------------------------------|
|            |                   | <p>V4. Frequency of emergency drills conducted before the flood.</p> <p>V5. Tanks, silos, or storage facilities securely anchored.</p> <p>V6. Stationary or mobile water barriers installed.</p> <p>V7. Sensitive equipment relocated to higher floors.</p> <p>V8. Water-hazardous substances relocated to higher floors.</p> <p>V9. Use of flood-prone areas adapted to risk.</p> <p>V10. Air conditioning/ventilation system flood-proofed.</p> <p>V11. Building flood safety improved (e.g., sealing basements, strengthening stability).</p> | <ul style="list-style-type: none"> <li>For drills, any positive frequency (<math>\geq 1</math> per year) was coded as 1, absence as 0.</li> </ul> <p>Weighting scheme:</p> <ul style="list-style-type: none"> <li>Low impact / basic preparedness (weight = 1): V1 to V4</li> <li>Medium impact / protective but limited scope (weight = 5): V5 to V8</li> <li>High impact / comprehensive protection (weight = 10): V9 to V11</li> </ul> <p>Calculation of weighted score (<math>p</math>):</p> $p = v1 + v2 + v3 + v4 + (5 \times (v5 + v6 + v7 + v8)) + (10 \times (v9 + v10 + v11))$ <p>Precaution Indicator (<math>pr</math>):</p> <ol style="list-style-type: none"> <li>No precautionary measures</li> <li>Medium precaution (<math>p: 1 - 5</math>)</li> <li>Very good precaution (<math>p \geq 6</math>)</li> </ol> |
| <i>in</i>  | Insurance         | Is the company insured against flood damages before the flood event?                                                                                                                                                                                                                                                                                                                                                                                                                                                                             | <ol style="list-style-type: none"> <li>No</li> <li>Yes</li> </ol>                                                                                                                                                                                                                                                                                                                                                                                                                                                                                                                                                                                                                                                                                                                                                            |
| <i>sp</i>  | Size premise      | How large is the property on which your company is located?                                                                                                                                                                                                                                                                                                                                                                                                                                                                                      | Continuous variable ( $m^2$ )                                                                                                                                                                                                                                                                                                                                                                                                                                                                                                                                                                                                                                                                                                                                                                                                |
| <i>sec</i> | Sector            | Which sector does your company belong to?                                                                                                                                                                                                                                                                                                                                                                                                                                                                                                        | <p>Categorical variable:</p> <ol style="list-style-type: none"> <li>Agriculture</li> <li>Manufacturing</li> <li>Commerce</li> <li>Financial</li> <li>Private and public services</li> </ol>                                                                                                                                                                                                                                                                                                                                                                                                                                                                                                                                                                                                                                  |
| <i>ss</i>  | Spatial situation | Which description best fits the spatial situation of this flood-affected company site?                                                                                                                                                                                                                                                                                                                                                                                                                                                           | <p>Categorical variable:</p> <ol style="list-style-type: none"> <li>Business premises with several buildings belonging to the company</li> <li>Entire building fully used by the company</li> <li>One or more floors in a building otherwise used for non-business purposes</li> </ol>                                                                                                                                                                                                                                                                                                                                                                                                                                                                                                                                       |

|              |                                  |                                                                                                                                  | 4. Less than one floor in a building otherwise used for non-business purposes                                                                                                                                                                                           |
|--------------|----------------------------------|----------------------------------------------------------------------------------------------------------------------------------|-------------------------------------------------------------------------------------------------------------------------------------------------------------------------------------------------------------------------------------------------------------------------|
| <i>own</i>   | Ownership                        | Are the buildings or rooms owned by the company or rented?                                                                       | 1. Owned<br>2. Rented<br>3. Partly owned / partly rented                                                                                                                                                                                                                |
| <i>emp</i>   | Number of employees              | How many people were employed in the previous month?                                                                             | Continuous variable                                                                                                                                                                                                                                                     |
| Damage type  |                                  |                                                                                                                                  |                                                                                                                                                                                                                                                                         |
| Predictand   |                                  | Description                                                                                                                      | Response                                                                                                                                                                                                                                                                |
| <i>bdam</i>  | Relative damage to building      | Represents the percentage of costs incurred repairing or replacing elements of the building fabric in relation to its new value. | Degree of damage between 0 and 1                                                                                                                                                                                                                                        |
| <i>edam</i>  | Relative damage to equipment     | Represents the percentage of costs incurred repairing or replacing equipment of fixed assets in relation to its new value.       | Degree of damage between 0 and 1                                                                                                                                                                                                                                        |
| <i>gsdam</i> | Relative damage to goods & stock | Represents the percentage of costs incurred repairing or replacing goods, products, and stock in relation to its new values.     | Degree of damage between 0 and 1                                                                                                                                                                                                                                        |
| <i>bid</i>   | Business interruption duration   | How long, in the aftermath the flooding event, were businesses operations totally interrupted                                    | 0 to 540 days (A value of 0 indicates no interruption, while values up to 540 indicate the reported duration of full shutdown. Cases recorded at 540 days reflect the survey limit, meaning that the business had not yet resumed operations at the time of the survey) |
| <i>brd</i>   | Business restriction duration    | How long, in the aftermath the flooding event, businesses operations resumed without any restrictions                            | 0 to 540 days (The maximum value is 540 days, meaning the business still had restrictions when the survey ended)                                                                                                                                                        |

Variable selection, please introduce this section. The variable selection section dives into the three machine learning techniques without introducing why these three techniques are used. In general, the method section needs more structure: it should be better explained why each algorithm/method is used. A clear motivation as to why the three specific techniques are used is needed.

We thank the reviewer for the feedback. In the revised manuscript, we will introduce the variable selection section with a clear rationale for choosing the three machine learning techniques, as follows:

## “2.2 Variable Selection

*Flood damage processes vary by region, flood type, and asset type (Mohor et al., 2020; Sairam et al., 2019; Wagenaar et al., 2018). Since our analysis focuses on flash floods and covers direct and indirect damages, we use a data-driven approach to identify which variables strongly influence these diverse outcomes. We adopt three feature selection approaches that are robust to multicollinearity and capable of capturing nonlinear relationships and interactions. To this end, we employ three complementary machine learning techniques: Elastic Net (EN), Random Forest (RF), and Extreme Gradient Boosting (XGBoost). EN efficiently handles multicollinearity and performs variable selection through regularization; RF captures nonlinear relationships and complex interactions via ensemble decision trees; and XGBoost, a gradient boosting algorithm, provides high predictive accuracy and models intricate dependencies. By combining the strengths of these methods, we assume to ensure a comprehensive assessment of variable importance. To mitigate potential biases from relying on a single model, we aggregate the variable importance scores across all three methods to derive a final ranking.”*

Minimizing  $J(\beta)$  should be called  $Obj(\beta)$  or it should be made more clear that  $J$  stands for the objective function as in equation 1 it is defined as  $Obj(\beta)$  and not  $J(\beta)$ .

$J(\beta)$  will be replaced with  $Obj(\beta)$  to match the notation used in Equation 1.

Variable importance: Please better explain/introduce why Bayesian Networks are used in this case.

We thank the reviewer for the feedback. In this study, BNs are employed to complement the machine learning models by providing a probabilistic framework for analyzing multivariate dependencies and scenario-based inference. Whereas EN, RF, and XGBoost primarily emphasize predictive accuracy and variable ranking, BNs explicitly capture conditional dependencies among variables. We will revise the section to better explain this motivation as follows:

*“Bayesian networks (BNs) are probabilistic graphical models that represent dependencies among multiple variables and enable multivariate predictive density estimation (Sucar, 2021). In this study, BNs are employed to complement the machine learning models by providing a probabilistic framework for analyzing multivariate dependencies and scenario-based inference. Whereas EN, RF, and XGBoost primarily emphasize predictive accuracy and variable ranking, BNs explicitly capture conditional dependencies among the variables. This is particularly valuable in flood damage analysis, where damage outcomes result from complex interactions between hazard intensity, company characteristics, and preparedness measures. Moreover, BNs are able to estimate posterior probabilities of damages given partial evidence (e.g., observed water depth or company preparedness), thereby offering a transparent and interpretable tool for risk assessment under uncertainty”.*

## Results and discussion

Overview of affected companies: It is implied that sales figures would be a better metric of company size although number of employees is more often used to classify whether the company is an SME or a large company. Therefore, this sentence is unnecessary in my opinion.

We agree with the reviewer and have removed this sentence in the revised manuscript.

‘These disruptions can result in partial or complete business interruptions, triggering consequences ranging from loss of sales to bankruptcy’. This sentence is unclear, loss of sales is a form of business interruption.

We will revise the sentence as follows:



*“Floods not only cause damage to tangible assets such as buildings or machinery but also lead to significant disruptions in supply chains and transportation. Such disruptions can result in partial or complete business interruptions and, in extreme cases, bankruptcy (Thieken et al., 2016).”*

It would also be interesting to show the differences in vulnerability and exposure levels between sectors instead of only between company sizes. This should be added or otherwise be explained why it is left out.

We thank the reviewer for this insightful suggestion. We agree that differences among sectors can provide additional perspectives on vulnerability and exposure. In our analysis, company size was found to be the dominant factor in explaining variations in damages. To maintain focus and clarity, our main emphasis in this study is on company size. However, sectoral difference is shown in the Supplementary Information (Fig. S4) and will be referred in the revised manuscript as follows:

*“Figure 2 illustrates the percentage of companies affected by various types of impacts, categorized by company size, while Figure S4 presents the same results by sectors. Since company size emerged as the dominant factor explaining variations in damages or revealed differences in vulnerability levels, our main emphasis in this study is on company size.”*

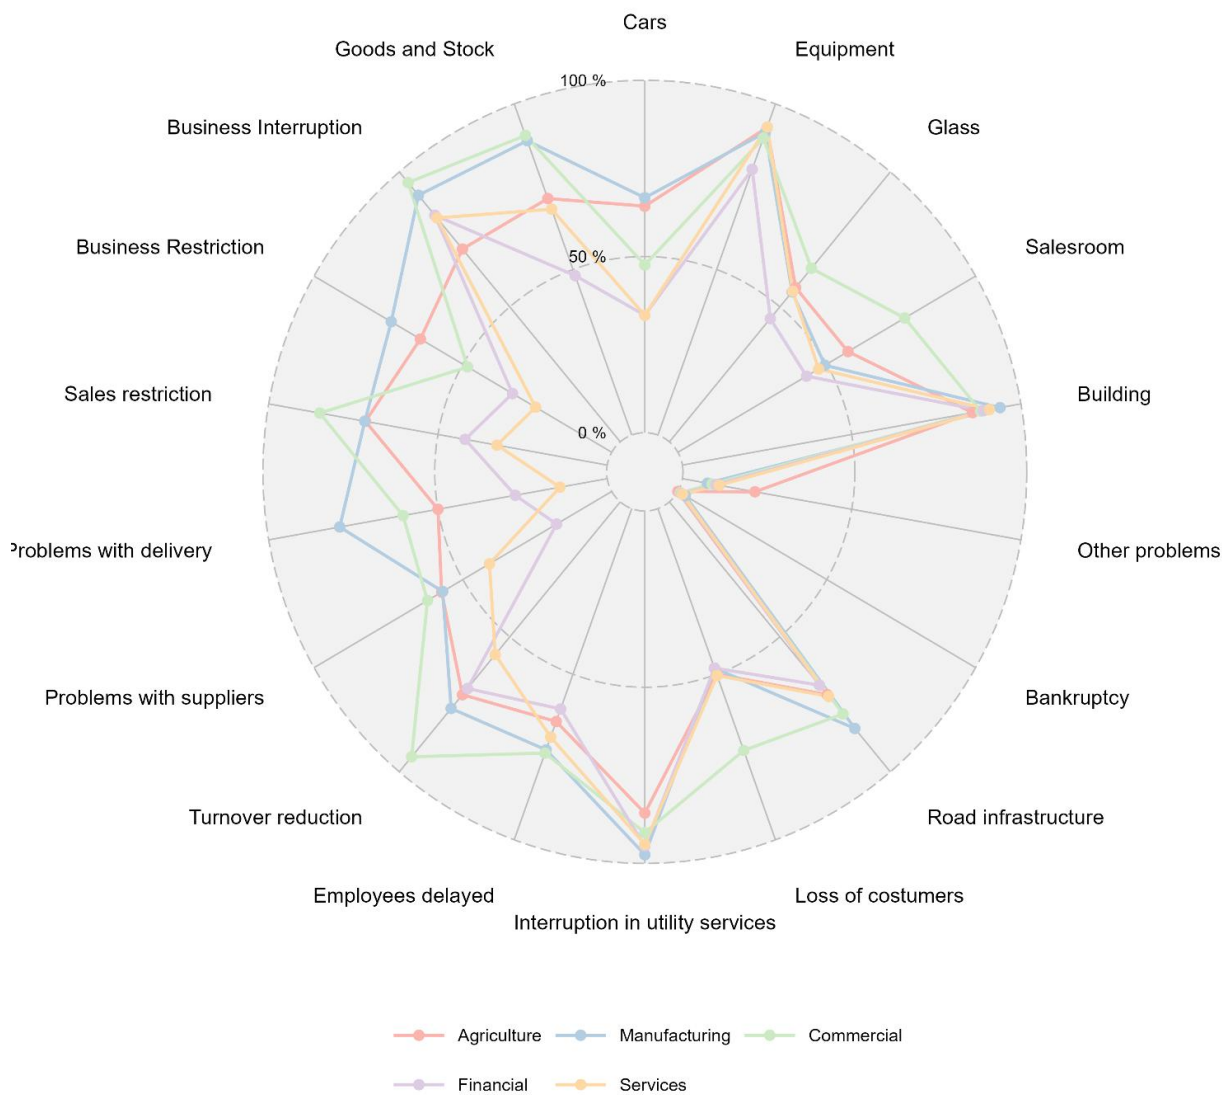

**Figure S4:** Spider chart illustrating the percentage of companies experiencing different types of flood impacts, categorized by the sector.

‘Bankruptcy risks remain generally low across all company sizes’. How is bankruptcy risk defined? Isn’t this a very biased variable given that bankrupt companies are probably not surveyed? Please clarify or leave this out.

We have tried contacting companies that went bankrupt, however it is challenging, as they are less likely to participate in survey and probably have already moved out of the affected area at the time of the survey. To avoid potential misinterpretation, we will remove this statement in the revised manuscript and also highlight it is one of the limitations.

‘They highlight the need for tailored risk management (...)’. Please clarify to what it should be tailored, to company size or also to company sector?

We will revise the sentence as follows:

P13/L311-314: *“Overall, the results illustrate the complex and diverse impacts of flooding on companies, varying by size. Micro and small companies are more susceptible to supply chain disruptions and sales restrictions, while larger companies face higher asset-related risks. Accordingly, risk management and resilience strategies should be tailored to company size”.*

‘Tend to recover more quickly, likely benefiting from greater resilience’. This sentence sounds tautological -> recovering more quickly is part of the definition of resilience.

We will revise the text as follows:

P14/L340-341: *“In contrast, medium and large companies tend to recover more quickly, likely because they benefit from diversified operations, and access to more substantial resources.”*

Figure 3: Please explain why the outlier levels differ between the business sizes. It seems weird to leave out observations for one class and leave them in for another. This does not look correct. Also, why are there no outliers removed for business restriction duration?

We thank the reviewer for this important observation. Figure 3 (provided below) presents the distribution of business interruption duration and business restriction duration across companies of varying sizes. Because quartiles (Q1, Q3) and interquartile ranges (IQR) differ between company size groups, the thresholds for detecting outliers also vary.

For business interruption duration, some smaller and medium-sized companies have values exceeding these thresholds, while (the few) larger companies do not. For business restriction duration, all observed values fall within the calculated bounds, so no outliers were detected. All data points are retained in the analysis, and the table below (shown only for response) provides the detailed statistics and identified outliers.

We will add the following text in the revised manuscript:

P13/L326-329: *“The number of outliers differs across company sizes because thresholds were determined using the standard  $1.5 \times IQR$  rule. For business restriction duration, no outliers were detected, as the upper thresholds were consistently high (e.g., >650 days for micro and small companies) and all observations fell within these ranges.”*

| Company size                   | Q1    | Q3     | IQR    | Outliers                                                               |
|--------------------------------|-------|--------|--------|------------------------------------------------------------------------|
| Business Interruption Duration |       |        |        |                                                                        |
| 1–9                            | 10.00 | 180.00 | 170.00 | 540.00, 500.00, 510.00, 499.00, 450.00, 540.00, 462.00, 540.00, 540.00 |

|                                      |        |        |        |                                                                                                                |
|--------------------------------------|--------|--------|--------|----------------------------------------------------------------------------------------------------------------|
| 10–49                                | 8.50   | 75.00  | 66.50  | 270.00, 270.00, 300.00, 180.00, 210.00, 180.00, 250.00, 365.00, 180.00, 420.00, 450.00, 420.00, 340.00, 270.00 |
| 50–249                               | 6.50   | 60.00  | 53.50  | 180.00, 540.00                                                                                                 |
| 250–480                              | 5.00   | 112.50 | 107.50 | –                                                                                                              |
| <b>Business Restriction Duration</b> |        |        |        |                                                                                                                |
| 1–9                                  | 36.25  | 290.00 | 253.75 | –                                                                                                              |
| 10–49                                | 28.00  | 280.00 | 252.00 | –                                                                                                              |
| 50–249                               | 12.00  | 150.00 | 138.00 | –                                                                                                              |
| 250–480                              | 120.00 | 120.00 | 0.00   | –                                                                                                              |

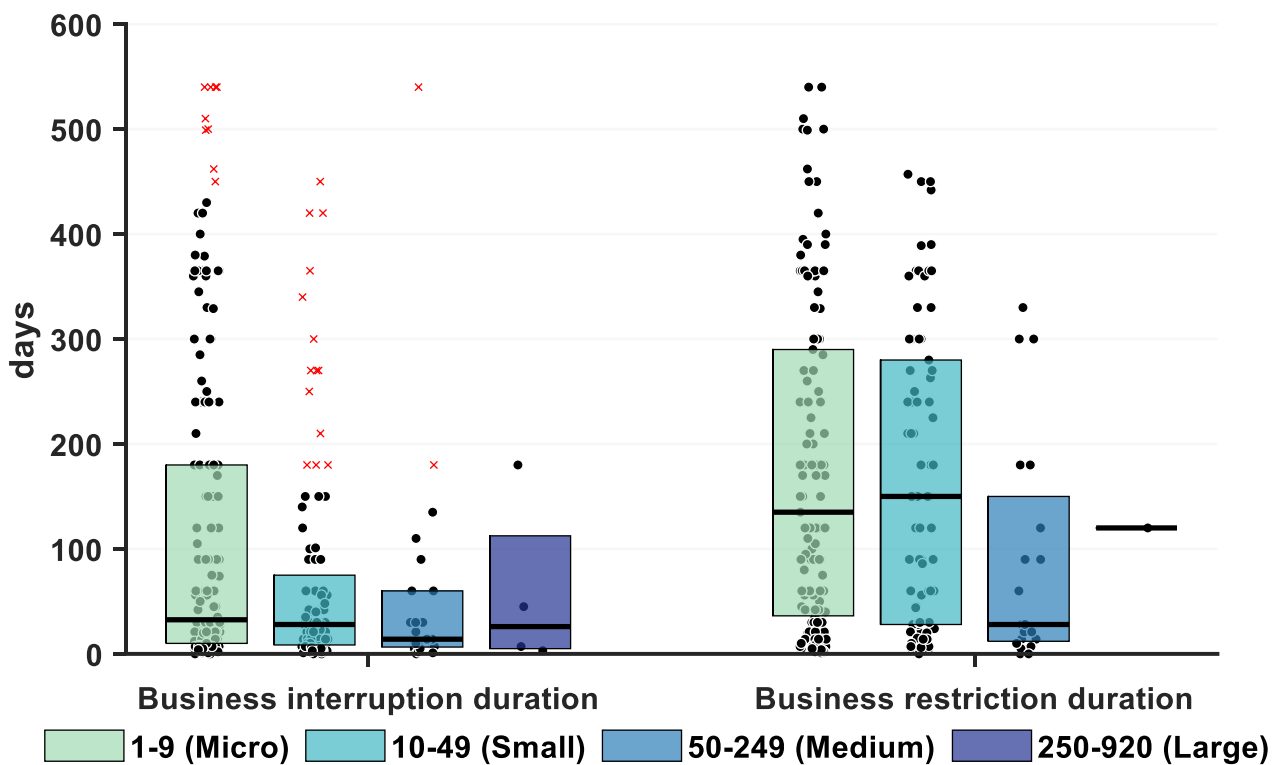

**Figure 1: Boxplot of (a) Business interruption duration (days) and (b) Business restriction duration (days) for companies categorized by the number of employees. Black circular markers represent individual data points, and red crosses indicate outliers identified using the  $1.5 \times \text{IQR}$  rule.**

Having an  $n=3$  for large companies is too low for any inference. Please make this more clear. ‘should be interpreted with caution’ does not cover it fully in my opinion.

We agree that a sample size of three for large companies is extremely small and does not allow for reliable statistical inference. We have revised the manuscript to explicitly highlight this limitation and to clarify that these results are illustrative rather than generalizable. We will add the following text in the revised manuscript:

*“Due to the extremely limited number of large companies surveyed, these results cannot be generalized. These values are presented for illustration purposes only and cannot be considered representative of large companies in general.”*

‘However, substantial variance within each category highlights the influence of extreme cases’. Maybe it is better to infer about the median values instead of the averages then. Please do this or clarify why not.

In the manuscript, we have clearly presented both median and mean values (Table 2) to provide a comprehensive picture of the financial losses. Both the medians and averages are included to highlight the impact of extreme cases. To improve clarity, we will revise the text to explicitly note that while the median values reflect more frequent losses, the mean is nonetheless informative, reflecting skewness of the data.

*P14-16/L348-381: “The average costs (in euros) for each company size are presented in Table 2, alongside medians and the number of companies (n) contributing to each calculation. Building damages accounted for the highest average costs across all company sizes, particularly impacting medium and large companies. Micro companies reported building damages of €711,459 on average, with a median of €250,000. This wide gap between the mean and median suggests that while many small firms experienced moderate losses, a few outliers faced severe damages. For small companies, the mean building damage increased to €908,482 (median €500,000). Medium companies faced substantial building-related losses, averaging €2,838,103 with a median of €1,350,000. Large companies, though represented by a very small sample (n = 4), reported the highest mean building damages of €7,350,000, reflecting the scale of structures at risk within large industrial facilities.*

*In terms of equipment damages, micro companies incurred a mean loss of €297,854 (median €50,000), while small companies experienced mean loss of €541,898 (median: €150,000). Medium companies reported the highest mean losses at €3,630,652 with a median of €600,000 likely driven by the presence of high-value machinery. Interestingly, large companies recorded a comparatively lower mean loss of €160,000 (median €200,000), though this is based on a very small sample size (n = 3). Lower median values across all groups suggest the presence of extreme cases skewing the mean, particularly among medium-sized companies. Goods and stock damages were generally lower across all company sizes (Table 2). Micro companies faced mean losses of €159,422 (median: €30,000), while small companies reported similar mean damages of €134,470 (median: €31,500). Medium companies experienced higher mean losses of €1,503,250 (median: €150,000), indicating greater inventory exposure. Large companies reported much smaller mean losses of €55,000 (median: €10,000), but are not representative due to the small sample. Lower median values that most companies incurred relatively less damages in this category, with a few outliers.*

*Business interruption losses also varied by company size. Micro companies faced interruption costs of €139,931 on average (median: €30,000), while small companies reported higher mean losses of €311,173 (median: €100,000). Medium companies were the most affected, with mean losses of €703,250 (median: €200,000). Large companies, despite the small sample size (n = 3), recorded an average business interruption cost of €400,000, with the median even higher at €500,000, reflecting significant operational disruptions. Overall, the financial costs associated with building, equipment, goods & stock, and business interruption showed that larger companies typically incurred more significant costs. Due to the extremely limited number of large companies surveyed, these results cannot be generalized. These values are presented for illustration purposes only and cannot be considered representative of large companies in general.”*

**Table 1: Average financial costs (in euros) incurred for building, equipment, goods and stock, and business interruption categorized by the number of employees (values in brackets represent**

medians, and n denotes the number of companies included in the calculation of the means and medians)

| Number of employees<br>(Company size) | Building                           | Equipment                        | Goods &<br>stock                 | Business<br>interruption       |
|---------------------------------------|------------------------------------|----------------------------------|----------------------------------|--------------------------------|
| 1-9 (Micro)                           | 711,459<br>(250,000)<br>n = 167    | 297,854<br>(50,000)<br>n = 203   | 159,422<br>(30,000)<br>n = 154   | 139,931<br>(30,000)<br>n = 143 |
| 10-49 (Small)                         | 908,482<br>(500,000)<br>n = 83     | 541,898<br>(150,000)<br>n = 96   | 134,470<br>(31,500)<br>n = 82    | 311,173<br>(100,000)<br>n = 74 |
| 50-249 (Medium)                       | 2,838,103<br>(1,350,000)<br>n = 29 | 3,630,652<br>(600,000)<br>n = 23 | 1,503,250<br>(150,000)<br>n = 20 | 703,250<br>(200,000)<br>n =16  |
| 249-920 (Large)                       | 7,350,000<br>(1,700,000)<br>n = 4  | 160,000<br>(200,000)<br>n = 3    | 55,000<br>(10,000)<br>n = 3      | 400,000<br>(500,000)<br>n = 3  |
| Total                                 | 1,080,999<br>(350,000)<br>n = 283  | 604,528<br>(100,000)<br>n = 325  | 254,083<br>(30,000)<br>n = 259   | 215,910<br>(50,000)<br>n=236   |

18 out of 19 variables had less than 7% missing data which was imputed. How much missing data did the other variable have and was this imputed too? Be more clear here.

We thank the reviewer for this observation. We will revise the text in the manuscript for clarity as follows:

*“The dataset exhibited less than 7% missing data for 18 out of 19 variables (Fig. S1), which were imputed using the kNN technique with k = 5 neighbors (Askr et al., 2024). The remaining variable, warning lead time (wt), had approximately 12% missing data, which was also imputed using the same approach.”*

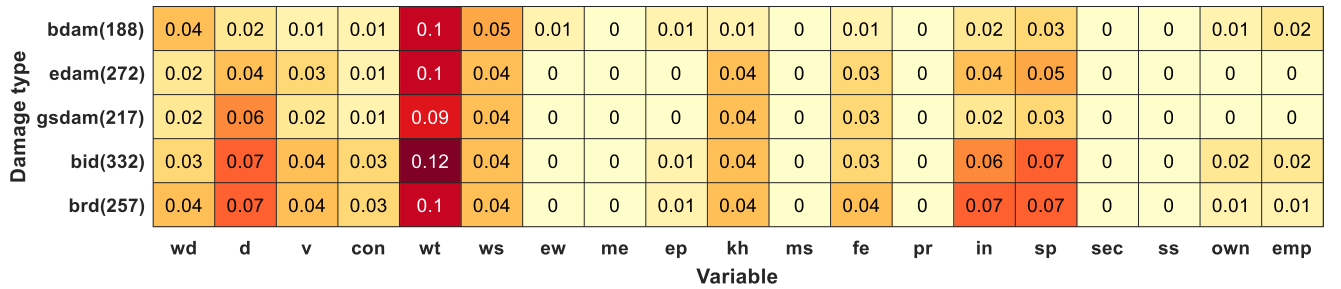

**Figure S1:** Percentage of missing values per factor (x-axis) for each damage type (y-axis). The values shown in the heatmap are the percentages of missing data, where 0.1 corresponds to 10%. The value in parentheses for each damage type indicates the number of responses available out of 431. For warning time (wt), cases where no warning was received are treated as zero.

Figure 4 and Figure 5: these abbreviations are unclear, write them out or find another way of making them more informative. A figure should be understandable on its own.

We thank the reviewer for this helpful suggestion. Figures 4, and 5 will be revised as follows, and all abbreviations are now written out in full to ensure that the figures are self-explanatory.

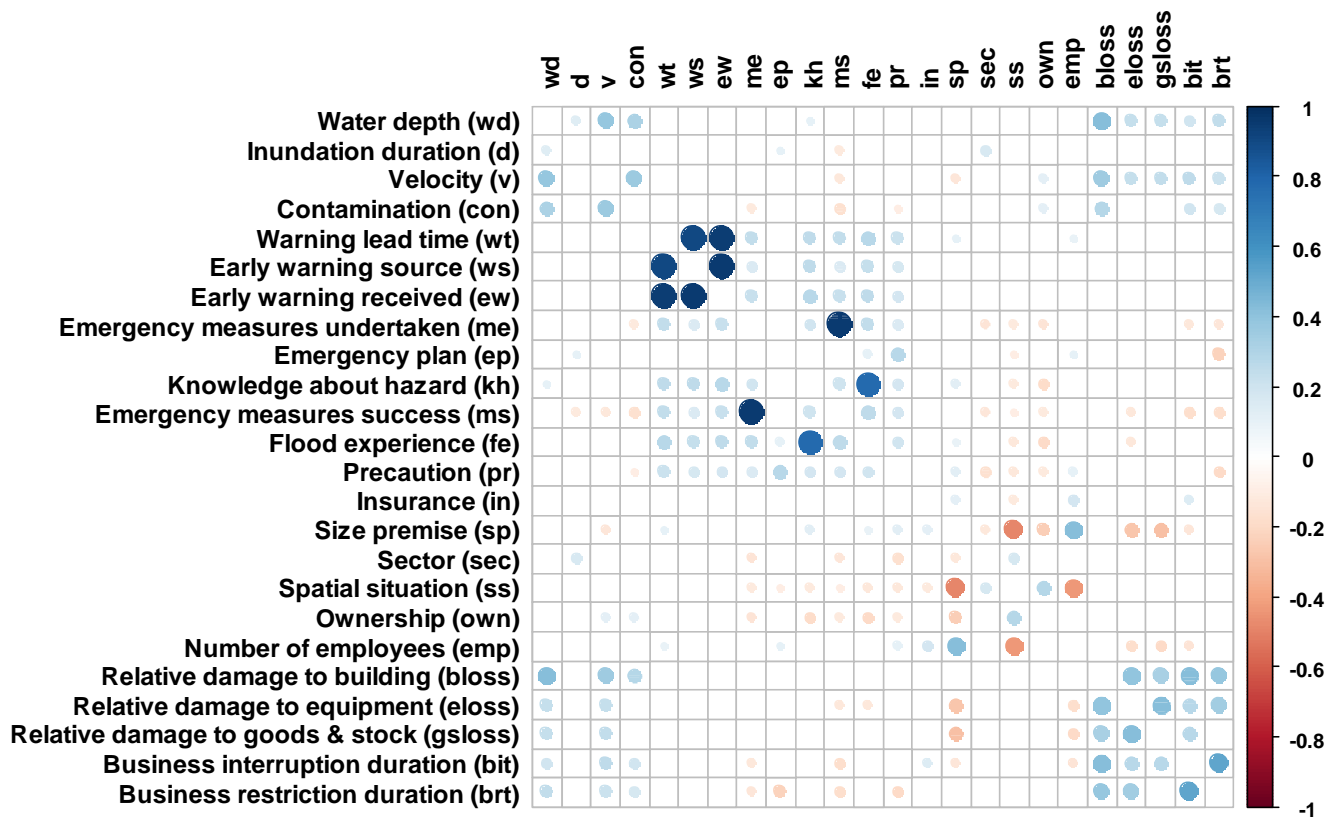

**Figure 4: Spearman rank correlation coefficients between 19 influencing factors and five damage types. Full names with abbreviations in brackets are shown in the rows, and abbreviations only in the columns. Only statistically significant correlations ( $p < 0.05$ ) are displayed, highlighting key relationships between influencing factors and damage outcomes.**



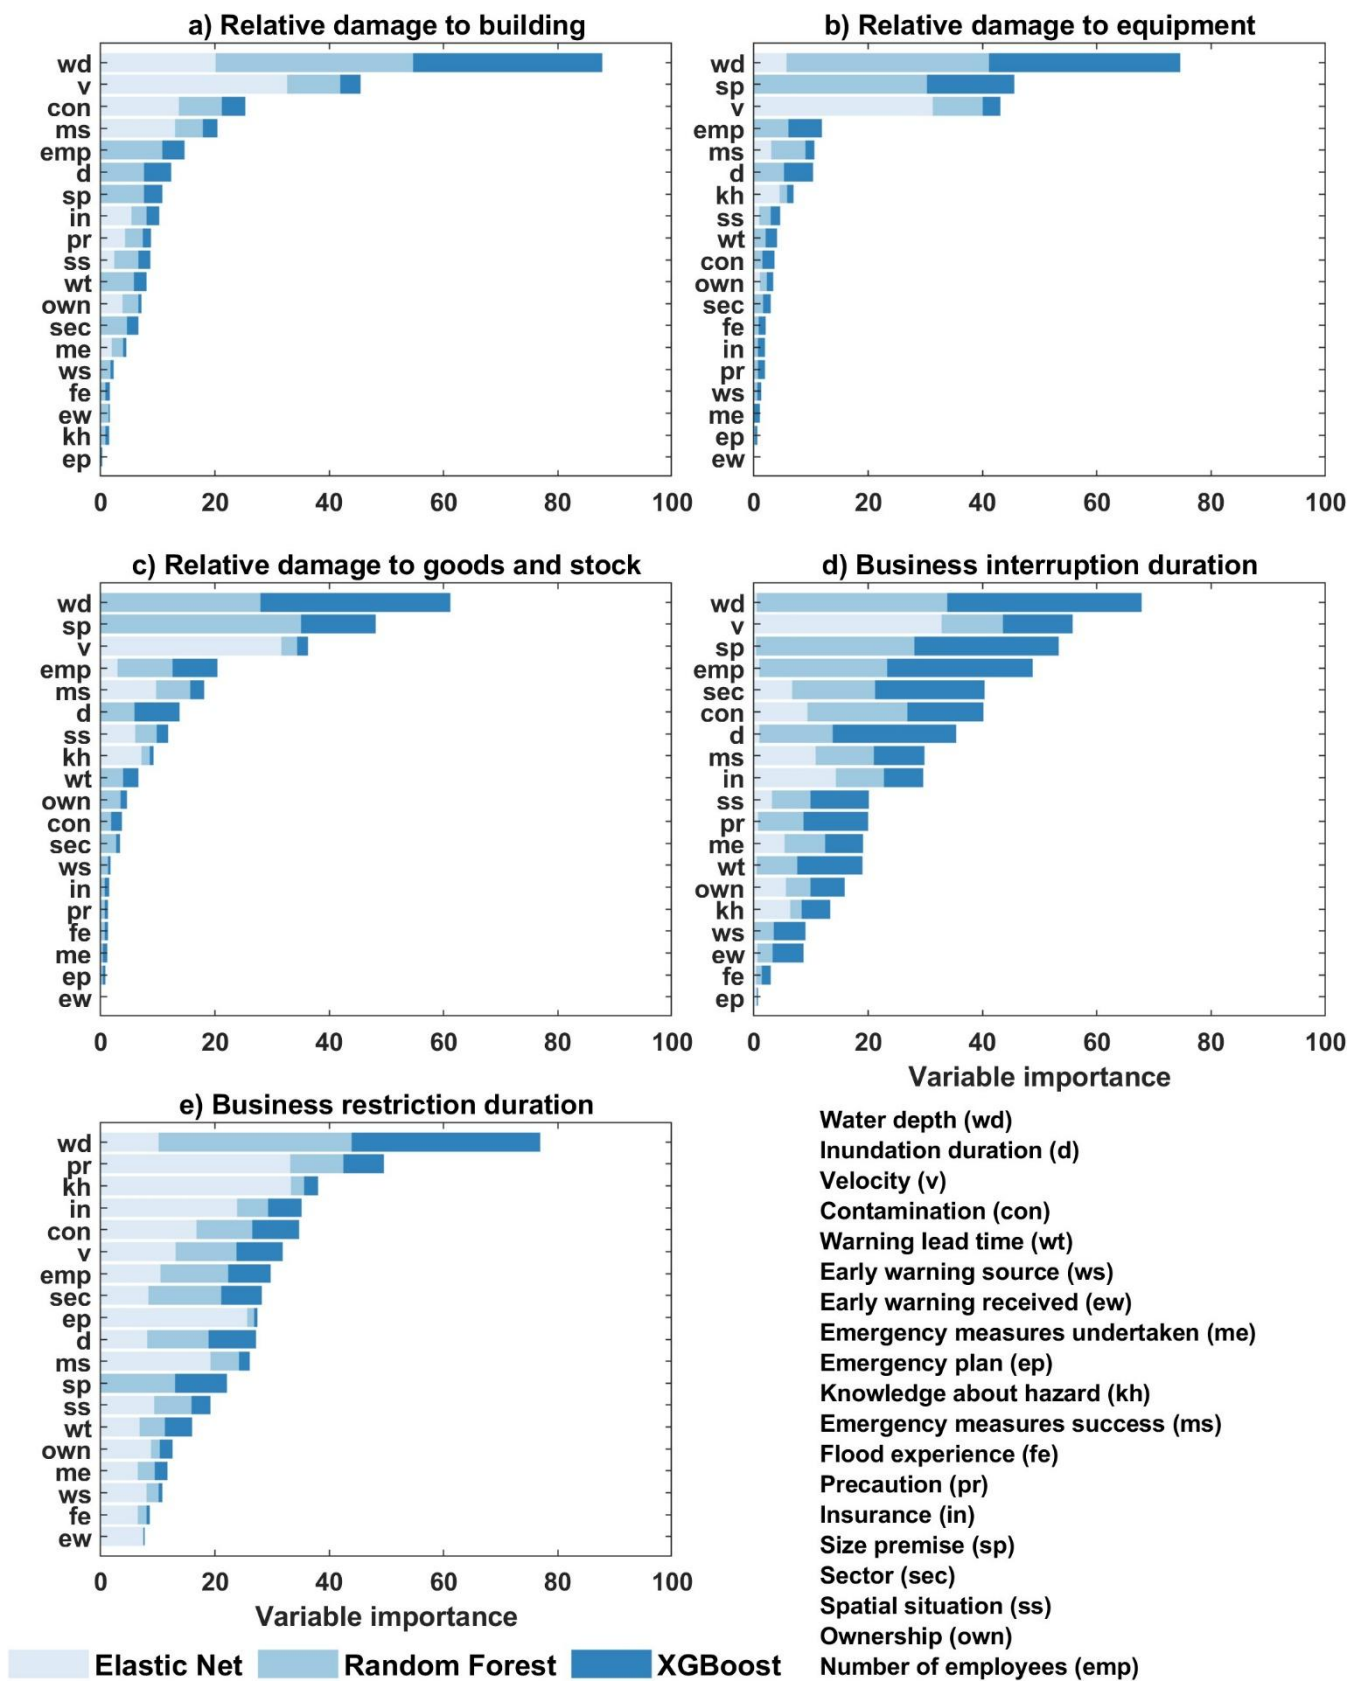

**Figure 5: Importance of influencing variables for damage types: (a) buildings, (b) equipment, (c) goods & stock, d) business interruption duration, and e) business restriction duration. The x-axis shows the weighted importance of each variable, obtained from the three models (Random Forest, Elastic Net, and XGBoost).**

‘This finding underscores (...) even during unprecedented events like the 2021 flood.’ The analysis was carried out for the unprecedented 2021 flood so the word ‘even’ feels misplaced.

Thank you. We will remove the word ‘even’.

Figure 6: same comment as for Figure 4 and Figure 5. In addition, the resolution of this figure should be higher.

We will revise the figure 6 as follows and all abbreviations are now written out in full form to ensure that it is self-explanatory. We will provide the high-resolution of the figure as a separate file.

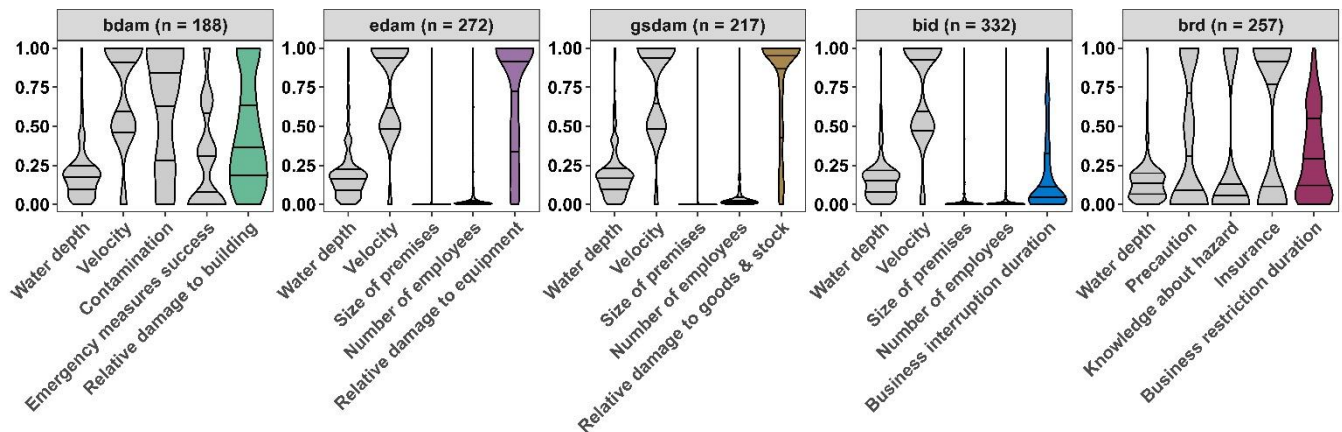

**Figure 6: Kernel density estimations of influencing factors and damage types, with all variables scaled between 0 and 1. The lines in the violin plots indicate the quartiles.**

The fact that the observed damage and business interruption/restriction durations are scaled from 0 to 1 make interpretation difficult. Saying that the 75th percentile decreases from 0.68 to 0.61 for example is hard to interpret. It would be better to make the results a bit more tangible, this way the results will also appeal more to policymakers and it makes the conclusion easier.

We thank the reviewer for this helpful suggestion. In the revised manuscript, business interruption and restriction durations will be presented in actual days rather than scaled values as follows:

*“The duration of business interruption varies with velocity and company size. Micro-companies (1–9 employees) show a consistent pattern under low and moderate flow conditions, with a median interruption duration of around 22 days. Under torrential flows, the median interruption duration rises sharply to nearly 60 days. Small companies (10–49 employees) exhibit a similar pattern, though their interruption duration under torrential flow is slightly lower. Medium and large companies (>49 employees) demonstrate greater resilience, with median interruption durations ranging from about 11 to 33 days across all flow conditions. The results indicate that small companies, especially micro-companies, have been disproportionately affected by the 2021 unprecedented flood event.*

*The analysis of business restriction duration, based on the Markov blanket, further shows that companies without precautionary measures experience the longest restrictions. For instance, the median restriction duration for companies without precautions increases from roughly 102 days when water depth < 1 meter to about 210 days for water depth > 2 meters. Implementing medium precautionary measures (see variable precaution in Table A1) results in a modest reduction in restriction duration, particularly for deeper water, where the 75<sup>th</sup> percentile decreases from 368 days to 330 days. A more substantial reduction is observed in companies with strong precautionary*



measures, where the median restriction durations remain below 150 days. For shallow water depth (< 1 meter), effective precautionary measures reduce the 75<sup>th</sup> percentile to 178 days, compared to 238 days in companies without precautions. These results highlight the effectiveness of precautionary measures in reducing business restriction durations”.

“In addition, for smaller premises (75–500 m<sup>2</sup>) the uncertainty is very less”, remove the “very” or replace with “much”.

Thank you. We will revise the sentence as follows:

*“In addition, there is less uncertainty for smaller premises (75–500 m<sup>2</sup>).”*

Please also add a discussion that elaborates on any shortcomings such as low sample size for some company sizes/sectors and outliers, potential selection bias etc. Directions for future research.

We thank the reviewer for this valuable suggestion. We will add the limitations and future scope in the conclusions section, as shown below:

*“While the study has deciphered the drivers of company damages during the 2021 flood event, it does have some limitations. First, the sample size for some company categories, particularly large companies, was small, which limits the generalization of findings. Second, survey participation was voluntary, which may have introduced self-selection bias. Although 431 responses are a notable sample size given the challenges of post-disaster data collection, future studies should aim for more diverse representation across different company sizes and sectors. This would further strengthen the generalizability of the findings. Moreover, comparative analyses across multiple extreme flood events in different geographical regions and socio-economic contexts, for instance, in Belgium and the Netherlands in the case of the 2021-event would allow for broader generalization of findings.”*

#### Conclusion:

The conclusion should be more extensive, this conclusion seems a bit too short and concise for an academic paper. There should be more links with the results section.

We thank the reviewer for the feedback. In the revised manuscript, we will add the limitations and future scope in the conclusions section as mentioned in the previous comment. The revised conclusion reads as follows:

*“The July 2021 flood in Germany highlighted the significant vulnerability of companies to extreme floods, with both direct and indirect damages resulting in substantial financial costs. A central question of this study was whether the influencing factors behind flood damage during the extreme July 2021 event differ from those in earlier floods from 2002 to 2016. Our findings indicate that core hazard related variables, including water depth, flow velocity, and contamination, remain consistent predictors of damage across different events. Similarly, company characteristics such as size of the premises and number of employees continue to play an important role. What sets the 2021 flood apart is the elevated importance of emergency preparedness and behavioral responses, particularly in shaping indirect damages such as business restriction duration, while the sector was not that important. A novel insight from this study is the demonstrated link between knowledge about flood hazard and amount of precaution taken, highlighting its relevance in reducing business restriction duration. Small and micro-companies that implemented very good precaution measures experienced notably shorter restriction durations.*

*While the study has deciphered the drivers of company damages during the 2021 flood event, it does have some limitations. First, the sample size for some company categories, particularly large companies, was small, which limits the generalization of findings. Second, survey participation was voluntary, which may have introduced self-selection bias. Although 431 responses are a notable*

*sample size given the challenges of post-disaster data collection, future studies should aim for more diverse representation across different company sizes and sectors. This would further strengthen the generalizability of the findings. Moreover, comparative analyses across multiple extreme flood events in different geographical regions and socio-economic contexts, for instance, in Belgium and the Netherlands in the case of the 2021-event would allow for broader generalization of findings. Finally, future research could explore the interrelations between different types of damages, for example by applying multi-level models, to better understand how direct, and indirect damages interact.”*

We hope that the reviewer is satisfied with the changes proposed. Again, we thank for the valuable comments that helped us to improve the manuscript.

## References

Askr, H., Abdel-Salam, M., and Hassanien, A. E.: Copula entropy-based golden jackal optimization algorithm for high-dimensional feature selection problems, *Expert Systems with Applications*, 238, 121582, <https://doi.org/10.1016/j.eswa.2023.121582>, 2024.

Mohor, G. S., Hudson, P., and Thieken, A. H.: A Comparison of Factors Driving Flood Losses in Households Affected by Different Flood Types, *Water Resources Research*, 56, e2019WR025943, <https://doi.org/10.1029/2019WR025943>, 2020.

Sairam, N., Schröter, K., Lüdtke, S., Merz, B., and Kreibich, H.: Quantifying Flood Vulnerability Reduction via Private Precaution, *Earth's Future*, 7, 235–249, <https://doi.org/10.1029/2018EF000994>, 2019.

Sucar, L. E.: *Probabilistic Graphical Models: Principles and Applications*, Springer International Publishing, Cham, <https://doi.org/10.1007/978-3-030-61943-5>, 2021.

Thieken, A. H., Bessel, T., Kienzler, S., Kreibich, H., Müller, M., Pisi, S., and Schröter, K.: The flood of June 2013 in Germany: how much do we know about its impacts?, *Nat. Hazards Earth Syst. Sci.*, 16, 1519–1540, <https://doi.org/10.5194/nhess-16-1519-2016>, 2016.

Wagenaar, D., Lüdtke, S., Schröter, K., Bouwer, L. M., and Kreibich, H.: Regional and Temporal Transferability of Multivariable Flood Damage Models, *Water Resources Research*, 54, 3688–3703, <https://doi.org/10.1029/2017WR022233>, 2018.
